# Supplementary material
Source: Springer Nature journal article supplement (https://www.springermedizin.de/resource/supplementary/12985_2011_1834_MOESM1_ESM.pdf/9610684)

### **Additional file**

IHC staining pictures of lung and lymph node of the inoculated pigs using monoclonal antibody to N protein

Lung and lymph node tissue sections of the JXwn06- and HB-1/3.9-inoculated pigs were stained by IHC using monoclonal antibody to N protein of PRRSV, and observed under 400× magnification. a, lung section of HB-1/3.9-inoculated pig; b, lung section of JXwn06-inoculated pig; c, lung section of control pig; d, lymph node section of HB-1/3.9-inoculated pig; e, lymph node section of JXwn06-inoculated pig; f, lymph node section of control pig.

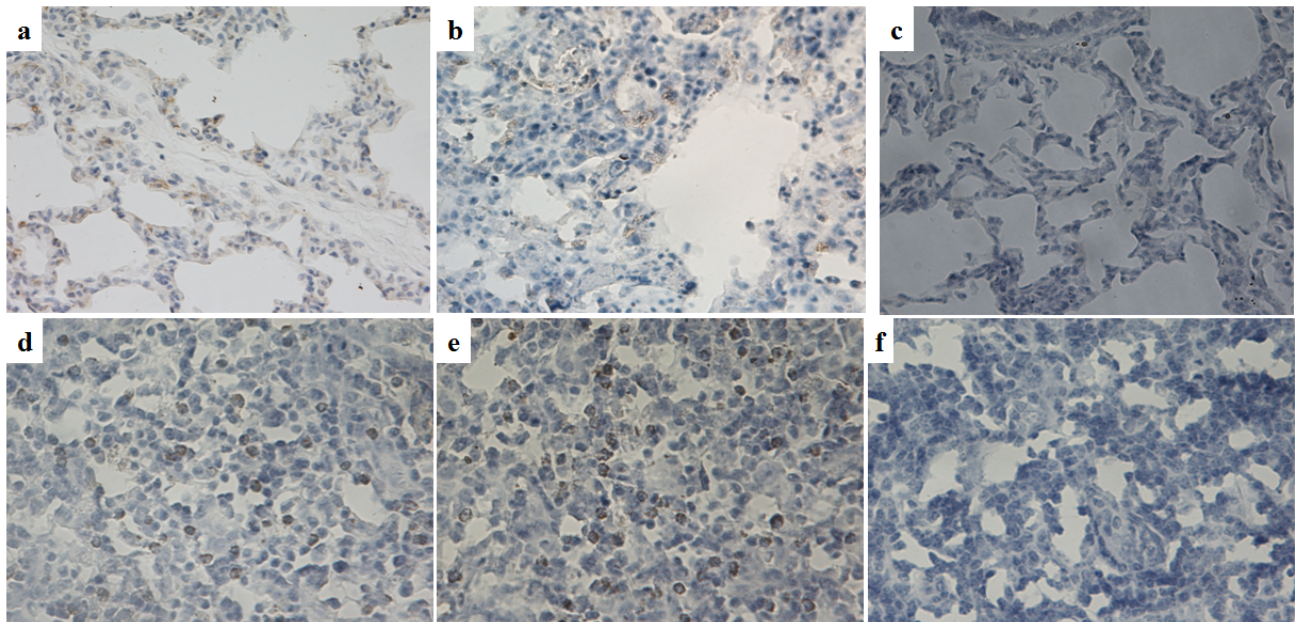

Supplement: MOESM1 [file 9610684]
